# Supplementary material for: Socioeconomic inequalities in childhood and adolescent body-mass index, weight, and height from 1953 to 2015: an analysis of four longitudinal, observational, British birth cohort studies
Source: PubMed Central journal article supplement (PMC5887082; doi:10.1016/s2468-2667(18)30045-8), 2018-03-21
Supplement: mmc1.pdf [file mmc1.pdf]

# THE LANCET

## Public Health

### **Supplementary appendix**

This appendix formed part of the original submission and has been peer reviewed. We post it as supplied by the authors.

Supplement to: Bann D, Johnson W, Li L, Kuh D, Hardy R. Socioeconomic inequalities in childhood and adolescent body-mass index, weight, and height from 1953 to 2015: an analysis of four longitudinal, observational, British birth cohort studies. *Lancet Public Health* 2018; published online March 20. [http://dx.doi.org/10.1016/S2468-2667\(18\)30045-8](http://dx.doi.org/10.1016/S2468-2667(18)30045-8).

Supplementary Table 1. Mean (SE) BMI, weight and height in childhood/adolescence by parental socioeconomic position

| <u>Body mass index</u> | Age | Father's social class |            |                |            |            | Maternal education |            |                  |  |
|------------------------|-----|-----------------------|------------|----------------|------------|------------|--------------------|------------|------------------|--|
|                        |     | I Professional        | II         | III Non-manual | III Manual | IV         | V Unskilled        | High       | Low (compulsory) |  |
| 1946 NSHD              | 7   | 15.9 (0.1)            | 15.9 (0.1) | 15.6 (0.1)     | 15.8 (0.0) | 15.8 (0.1) | 15.9 (0.1)         | 15.7 (0.1) | 15.8 (0.0)       |  |
|                        | 11  | 17.6 (0.2)            | 17.6 (0.1) | 17.3 (0.1)     | 17.4 (0.1) | 17.4 (0.1) | 17.5 (0.2)         | 17.3 (0.1) | 17.5 (0.1)       |  |
|                        | 15  | 20.1 (0.2)            | 20.5 (0.1) | 20.0 (0.1)     | 20.3 (0.1) | 20.6 (0.1) | 20.5 (0.3)         | 20.2 (0.1) | 20.5 (0.1)       |  |
| 1958 NCDS              | 7   | 15.7 (0.1)            | 15.8 (0.0) | 15.6 (0.0)     | 15.8 (0.0) | 15.7 (0.0) | 15.8 (0.1)         | 15.7 (0.0) | 15.7 (0.0)       |  |
|                        | 11  | 17.1 (0.1)            | 17.3 (0.1) | 17.1 (0.1)     | 17.3 (0.0) | 17.3 (0.1) | 17.1 (0.1)         | 17.1 (0.0) | 17.3 (0.0)       |  |
|                        | 16  | 19.8 (0.1)            | 20.1 (0.1) | 20.0 (0.1)     | 20.3 (0.0) | 20.3 (0.1) | 20.1 (0.1)         | 20.0 (0.0) | 20.3 (0.0)       |  |
| 1970 BCS               | 10  | 17.3 (0.1)            | 17.3 (0.0) | 17.3 (0.1)     | 17.4 (0.0) | 17.5 (0.1) | 17.3 (0.1)         | 17.3 (0.0) | 17.4 (0.0)       |  |
|                        | 16  | 19.9 (0.1)            | 20.0 (0.1) | 20.0 (0.1)     | 20.3 (0.1) | 20.4 (0.1) | 20.4 (0.2)         | 19.9 (0.1) | 20.3 (0.0)       |  |
| 2000/1 MCS             | 7   | 16.1 (0.1)            | 16.3 (0.0) | 16.3 (0.1)     | 16.4 (0.1) | 16.6 (0.1) | 16.7 (0.2)         | 16.3 (0.0) | 16.6 (0.0)       |  |
|                        | 11  | 18.3 (0.1)            | 18.7 (0.1) | 19.0 (0.1)     | 19.1 (0.1) | 19.6 (0.1) | 19.5 (0.3)         | 18.7 (0.1) | 19.4 (0.1)       |  |
|                        | 14  | 21.0 (0.2)            | 21.5 (0.1) | 21.5 (0.1)     | 21.9 (0.1) | 22.4 (0.2) | 22.9 (0.4)         | 21.5 (0.1) | 22.2 (0.1)       |  |
| <u>Weight</u>          |     |                       |            |                |            |            |                    |            |                  |  |
| 1946 NSHD              | 7   | 23.6 (0.2)            | 23.3 (0.1) | 22.5 (0.2)     | 22.3 (0.1) | 22.3 (0.1) | 22.0 (0.3)         | 22.9 (0.1) | 22.3 (0.1)       |  |
|                        | 11  | 36.2 (0.5)            | 36.0 (0.3) | 35.1 (0.3)     | 34.6 (0.2) | 34.7 (0.3) | 33.9 (0.6)         | 35.2 (0.2) | 34.8 (0.1)       |  |
|                        | 15  | 53.8 (0.7)            | 54.9 (0.4) | 53.2 (0.4)     | 52.9 (0.3) | 53.6 (0.4) | 51.9 (0.8)         | 53.6 (0.3) | 53.3 (0.2)       |  |
| 1958 NCDS              | 7   | 23.3 (0.2)            | 23.1 (0.1) | 22.7 (0.1)     | 22.6 (0.1) | 22.5 (0.1) | 22.1 (0.1)         | 23.0 (0.1) | 22.5 (0.0)       |  |
|                        | 11  | 35.6 (0.3)            | 35.9 (0.2) | 35.2 (0.2)     | 34.9 (0.1) | 34.7 (0.2) | 34.0 (0.2)         | 35.3 (0.1) | 35.0 (0.1)       |  |
|                        | 16  | 54.0 (0.4)            | 54.3 (0.2) | 53.9 (0.3)     | 53.7 (0.2) | 53.4 (0.3) | 52.6 (0.4)         | 53.9 (0.2) | 53.6 (0.1)       |  |
| 1970 BCS               | 10  | 36.1 (0.2)            | 36.1 (0.1) | 36.0 (0.2)     | 35.7 (0.1) | 35.6 (0.1) | 35.1 (0.2)         | 36.2 (0.1) | 35.6 (0.1)       |  |
|                        | 16  | 53.9 (0.5)            | 53.7 (0.2) | 53.7 (0.4)     | 53.5 (0.2) | 53.3 (0.4) | 53.3 (0.6)         | 53.7 (0.2) | 53.4 (0.2)       |  |
| 2000/1 MCS             | 7   | 24.4 (0.2)            | 24.4 (0.1) | 24.5 (0.2)     | 24.4 (0.1) | 24.7 (0.2) | 25.0 (0.4)         | 24.4 (0.1) | 24.6 (0.1)       |  |
|                        | 11  | 39.8 (0.4)            | 40.1 (0.2) | 40.7 (0.3)     | 40.7 (0.2) | 41.8 (0.3) | 41.8 (0.8)         | 40.2 (0.1) | 41.1 (0.2)       |  |
|                        | 14  | 60.0 (0.6)            | 60.6 (0.2) | 60.7 (0.4)     | 61.1 (0.3) | 62.3 (0.5) | 63.9 (1.2)         | 60.7 (0.2) | 61.8 (0.2)       |  |

| <u>Height</u><br>Cohort | Age | Father's social class |             |                |             |             | Maternal education |             |                  |
|-------------------------|-----|-----------------------|-------------|----------------|-------------|-------------|--------------------|-------------|------------------|
|                         |     | I Professional        | II          | III Non-manual | III Manual  | IV          | V Unskilled        | High        | Low (compulsory) |
| 1946 NSHD               | 7   | 121.9 (0.4)           | 120.9 (0.3) | 120.3 (0.3)    | 118.9 (0.2) | 118.8 (0.3) | 117.4 (0.4)        | 120.7 (0.2) | 118.8 (0.1)      |
|                         | 11  | 143.3 (0.5)           | 142.8 (0.3) | 142.3 (0.4)    | 140.6 (0.2) | 140.8 (0.3) | 138.4 (0.5)        | 142.2 (0.3) | 140.6 (0.2)      |
|                         | 15  | 163.9 (0.6)           | 164.2 (0.4) | 163.5 (0.4)    | 161.8 (0.3) | 162.1 (0.4) | 159.3 (0.6)        | 163.5 (0.3) | 161.9 (0.2)      |
| 1958 NCDS               | 7   | 122.4 (0.2)           | 121.9 (0.1) | 121.5 (0.2)    | 120.5 (0.1) | 120.2 (0.1) | 119.3 (0.2)        | 121.8 (0.1) | 120.4 (0.1)      |
|                         | 11  | 144.1 (0.3)           | 143.5 (0.2) | 143.3 (0.2)    | 141.8 (0.1) | 141.5 (0.2) | 140.6 (0.2)        | 143.4 (0.1) | 141.9 (0.1)      |
|                         | 16  | 163.6 (0.4)           | 162.8 (0.2) | 162.7 (0.3)    | 161.3 (0.1) | 160.7 (0.2) | 160.3 (0.3)        | 162.8 (0.2) | 161.1 (0.1)      |
| 1970 BCS                | 10  | 143.4 (0.3)           | 143.1 (0.1) | 142.9 (0.2)    | 141.8 (0.1) | 141.4 (0.2) | 140.7 (0.2)        | 143.2 (0.1) | 141.6 (0.1)      |
|                         | 16  | 162.6 (0.5)           | 162.4 (0.2) | 162.3 (0.3)    | 160.7 (0.2) | 160.1 (0.3) | 160.3 (0.5)        | 162.5 (0.2) | 160.6 (0.1)      |
| 2000/1 MCS              | 7   | 123.5 (0.3)           | 122.8 (0.1) | 122.8 (0.2)    | 122.1 (0.1) | 122.0 (0.2) | 122.6 (0.4)        | 122.8 (0.1) | 122.1 (0.1)      |
|                         | 11  | 146.9 (0.3)           | 145.9 (0.1) | 145.9 (0.2)    | 145.3 (0.2) | 145.4 (0.2) | 146.0 (0.5)        | 146.0 (0.1) | 145.2 (0.1)      |
|                         | 14  | 170.1 (0.4)           | 169.1 (0.2) | 168.9 (0.3)    | 168.2 (0.2) | 168.0 (0.3) | 168.5 (0.7)        | 169.1 (0.1) | 168.0 (0.1)      |

Supplementary Table 2. Social class, maternal education, and missing data tabulations in four British birth cohort studies

|                                                                                      | 1946 NSHD |        | 1958 NCDS |        | 1970 BCS |        | 2000/1 MCS |         |
|--------------------------------------------------------------------------------------|-----------|--------|-----------|--------|----------|--------|------------|---------|
|                                                                                      | N         | %      | N         | %      | N        | %      | N          | %       |
| Father's social class at 10/11y, N (%)                                               |           |        |           |        |          |        |            |         |
| I Professional                                                                       | 238       | (4.4)  | 577       | (3.4)  | 604      | (3.5)  | 469        | (2.9)   |
| II Managerial and technical                                                          | 766       | (14.3) | 2483      | (14.4) | 2984     | (17.3) | 3839       | (23.4)  |
| III Skilled non-manual                                                               | 604       | (11.3) | 1315      | (7.6)  | 1333     | (7.7)  | 1198       | (7.3)   |
| III Skilled manual                                                                   | 1334      | (24.9) | 5305      | (30.8) | 5174     | (29.9) | 2034       | (12.4)  |
| IV Partly skilled                                                                    | 745       | (13.9) | 1925      | (11.2) | 1754     | (10.1) | 1292       | (7.9)   |
| V Unskilled                                                                          | 241       | (4.5)  | 1113      | (6.5)  | 872      | (5.0)  | 256        | (1.6)   |
| Missing                                                                              | 1434      | (26.7) | 4484      | (26.1) | 4569     | (26.4) | 7316       | (44.6)  |
| Missing father's social class data<br>Amongst those with valid BMI data at 10/11y    | 308       | (7.82) | 577       | (4.90) | 370      | (3.19) | 2176       | (19.79) |
| Maternal<br>Education (binary) <sup>a</sup> , N (%)                                  |           |        |           |        |          |        |            |         |
| Post-compulsory                                                                      | 1237      | (23.1) | 4229      | (24.6) | 5624     | (32.5) | 8183       | (49.9)  |
| Compulsory schooling only                                                            | 3105      | (57.9) | 12729     | (74.0) | 10741    | (62.1) | 8167       | (49.8)  |
| Missing                                                                              | 1020      | (19.0) | 244       | (1.4)  | 925      | (5.3)  | 54         | (0.3)   |
| Missing maternal education class data<br>Amongst those with valid BMI data at 10/11y | 231       | (5.87) | 140       | (1.19) | 387      | (3.34) | 13         | (0.12)  |
| Maternal education (number of years) <sup>b</sup> , N (%)                            |           |        |           |        |          |        |            |         |
| ≥17                                                                                  | 384       | (7.2)  | 994       | (5.8)  | 2906     | (16.8) | 8183       | (49.9)  |
| 16                                                                                   | 471       | (8.8)  | 1170      | (6.8)  | 2714     | (15.7) | 6254       | (38.1)  |
| 15                                                                                   | 382       | (7.1)  | 3153      | (18.3) | 9542     | (55.2) | 1502       | (9.2)   |
| ≤14                                                                                  | 3105      | (57.9) | 4935      | (28.7) | 1166     | (6.7)  | 411        | (2.5)   |
| Missing                                                                              | 1020      | (19.0) | 6950      | (40.4) | 962      | (5.6)  | 54         | (0.3)   |
| Valid BMI data at 10/11y                                                             | 3937      | (73.4) | 11770     | (68.4) | 11601    | (67.1) | 10996      | (67.0)  |
| Missing BMI data at 10/11y                                                           | 1425      | (26.6) | 5432      | (31.6) | 5689     | (32.9) | 5408       | (33.0)  |
| Valid BMI data at 14/16y                                                             | 3581      | (66.8) | 10236     | (59.5) | 7513     | (43.5) | 9389       | (57.2)  |
| Missing BMI data at 14/16y                                                           | 1781      | (33.2) | 6966      | (40.5) | 9777     | (56.5) | 7015       | (42.8)  |

<sup>a</sup>Measured at birth in 1958 NCDS and 1970 BCS, 9 months in 2001 MCS, and age 6 in 1946 NSHD; <sup>b</sup>measured at the same ages as binary maternal education, except at age 16 years in 1958 NCDS. Note: missing data includes death/emigration from Britain/drop out/refusal to participate.

Supplementary Table 3. Odds of missing data at 14/16 years according to social class and preceding BMI in four British birth cohort studies

| <u>Cohort</u> | <u>N</u> | Social class             | BMI at 10/11 years |
|---------------|----------|--------------------------|--------------------|
|               |          | (slope index inequality) |                    |
|               |          | <u>OR (95% CI)</u>       | <u>OR (95% CI)</u> |
| 1946 NSHD     | 3,629    | 1.08 (0.72, 1.61)        | 1.00 (0.96, 1.05)  |
| 1958 NCDS     | 11,193   | 1.37 (1.18, 1.60)        | 1.03 (1.01, 1.04)  |
| 1970 BCS70    | 11,231   | 1.93 (1.68, 2.21)        | 1.00 (0.99, 1.03)  |
| 2001 MCS      | 8,820    | 2.29 (1.82, 2.88)        | 1.06 (1.04, 1.08)  |

Supplementary Table 4. Father's social class and BMI, weight and height in childhood/adolescence (7-15 years): estimates (SE) from separate multilevel models, scaled to show estimated BMI differences at 11 years

|                                          | Cohort (age)     |        |                |        |               |        |                |        |
|------------------------------------------|------------------|--------|----------------|--------|---------------|--------|----------------|--------|
|                                          | 1946 NSHD        | P      | 1958 NCDS      | P      | 1970 BCS      | P      | 2001 MCS       | P      |
|                                          | (7, 11, 15)      |        | (7, 11, 15)    |        | (10, 15)      |        | (7, 11, 15)    |        |
| <u>Body mass index, kg/m<sup>2</sup></u> |                  |        |                |        |               |        |                |        |
| Number of observations                   | 10401            |        | 30667          |        | 17880         |        | 24553          |        |
| β Age                                    | 0.56 (0.01)      | <0.001 | 0.53 (0.0065)  | <0.001 | 0.63 (0.019)  | <0.001 | 0.64 (0.0081)  | <0.001 |
| β SEP ridit score                        | 0.12 (0.12)      | 0.333  | 0.1 (0.072)    | 0.154  | 0.14 (0.085)  | 0.093  | 0.96 (0.13)    | <0.001 |
| SEP*age interaction                      | 0.026 (0.018)    | 0.159  | 0.033 (0.012)  | 0.004  | 0.12 (0.035)  | 0.001  | 0.1 (0.015)    | <0.001 |
| β Gender (ref female)                    | 0.17 (0.053)     | 0.001  | 0.0082 (0.034) | 0.808  | -0.39 (0.037) | <0.001 | 0.12 (0.051)   | 0.023  |
| Constant                                 | 18 (0.072)       |        | 18 (0.044)     |        | 18 (0.052)    |        | 19 (0.079)     |        |
| Random effect: sd(age)                   | 0.31 (0.0062)    |        | 0.17 (0.0047)  |        |               |        | 0.35 (0.013)   |        |
| Random effect: sd(_cons)                 | 2.6 (0.059)      |        | 0.36 (0.24)    |        |               |        | 2.1 (0.19)     |        |
| Random effect: sd(Residual)              | 0.77 (0.015)     |        | 1.4 (0.011)    |        |               |        | 1.2 (-0.096)   |        |
| <u>Weight, kg</u>                        |                  |        |                |        |               |        |                |        |
| β Age                                    | 3.9 (0.031)      | <0.001 | 3.8 (0.022)    | <0.001 | 4.4 (0.057)   | <0.001 | 4.6 (0.03)     | <0.001 |
| β SEP ridit score                        | -1.6 (0.35)      | <0.001 | -1.5 (0.21)    | <0.001 | -1 (0.25)     | <0.001 | 1 (0.36)       | 0.003  |
| SEP*age interaction                      | -0.027 (0.057)   | 0.638  | -0.05 (0.038)  | 0.191  | 0.11 (0.1)    | 0.274  | 0.18 (0.054)   | 0.001  |
| β Gender (ref female)                    | 0.29 (0.12)      | 0.011  | -0.66 (0.082)  | <0.001 | 2.1 (0.11)    | <0.001 | -0.37 (0.1)    | <0.001 |
| Constant                                 | 38 (0.2)         |        | 38 (0.13)      |        | 35 (0.15)     |        | 42 (0.21)      |        |
| Random effect: sd(age)                   | 0.97 (0.017)     |        | 0.78 (0.009)   |        |               |        | 1.2 (0.022)    |        |
| Random effect: sd(_cons)                 | 6.2 (0.14)       |        | 3 (0.085)      |        |               |        | 5.6 (0.28)     |        |
| Random effect: sd(Residual)              | 2.3 (0.033)      |        | 3.7 (-0.019)   |        |               |        | 3.3 (-0.13)    |        |
| <u>Height, cm</u>                        |                  |        |                |        |               |        |                |        |
| β Age                                    | 5.4 (0.024)      | <0.001 | 5.1 (0.017)    | <0.001 | 4.9 (0.056)   | <0.001 | 5.8 (0.017)    | <0.001 |
| β SEP ridit score                        | -4 (0.36)        | <0.001 | -3.3 (0.21)    | <0.001 | -2.9 (0.24)   | <0.001 | -1.4 (0.26)    | <0.001 |
| SEP*age interaction                      | -0.00115 (0.044) | 0.997  | -0.032 (0.03)  | 0.286  | -0.066 (0.1)  | 0.509  | -0.092 (0.031) | 0.002  |
| β Gender (ref female)                    | 0.32 (0.19)      | 0.085  | 0.13 (0.11)    | 0.231  | 4.2 (0.11)    | <0.001 | -0.3 (0.13)    | 0.022  |
| Constant                                 | 143 (0.22)       |        | 143 (0.13)     |        | 141 (0.15)    |        | 146 (0.18)     |        |
| Random effect: sd(age)                   | 0.71 (0.013)     |        | 0.4 (0.013)    |        |               |        | 0.54 (0.014)   |        |
| Random effect: sd(_cons)                 | 7.6 (0.16)       |        | 3.8 (0.19)     |        |               |        | 5 (0.19)       |        |
| Random effect: sd(Residual)              | 1.9 (0.036)      |        | 3.7 (0.027)    |        |               |        | 2.6 (-0.062)   |        |

Supplementary Table 5. Father's social class (slope index of inequality) and risk of thinness, overweight or obesity

| Age, cohort     | BMI category | N    | Difference in predicted probability | 95% CI           | Relative risk ratio | 95% CI        |
|-----------------|--------------|------|-------------------------------------|------------------|---------------------|---------------|
| <u>7 years</u>  |              |      |                                     |                  |                     |               |
| 1946 NSHD       | Thinness     | 296  | 0.022                               | (-0.018, 0.062)  | 1.37                | (0.78, 2.41)  |
|                 | Normal       | 2964 | -0.017                              | (-0.072, 0.037)  | Ref                 |               |
|                 | Overweight   | 237  | -0.022                              | (-0.059, 0.015)  | 0.73                | (0.40, 1.35)  |
|                 | Obese        | 23   | 0.017                               | (-0.002, 0.036)  | 8.07                | (1.06, 61.73) |
| 1958 NCDS       | Thinness     | 1146 | 0.002                               | (-0.020, 0.023)  | 1.02                | (0.81, 1.27)  |
|                 | Normal       | 8537 | 0.000                               | (-0.027, 0.028)  | Ref                 |               |
|                 | Overweight   | 780  | -0.003                              | (-0.021, 0.015)  | 0.96                | (0.74, 1.26)  |
|                 | Obese        | 187  | 0.001                               | (-0.008, 0.010)  | 1.05                | (0.62, 1.78)  |
| 2001 MCS        | Thinness     | 632  | 0.007                               | (-0.016, 0.030)  | 1.25                | (0.87, 1.80)  |
|                 | Normal       | 6127 | -0.093                              | (-0.136, -0.049) | Ref                 |               |
|                 | Overweight   | 1120 | 0.043                               | (0.011, 0.076)   | 1.57                | (1.17, 2.11)  |
|                 | Obese        | 461  | 0.043                               | (0.024, 0.062)   | 2.71                | (1.80, 4.08)  |
| <u>11 years</u> |              |      |                                     |                  |                     |               |
| 1946 NSHD       | Thinness     | 388  | 0.021                               | (-0.021, 0.063)  | 1.26                | (0.78, 2.03)  |
|                 | Normal       | 2921 | -0.015                              | (-0.070, 0.040)  | Ref                 |               |
|                 | Overweight   | 275  | -0.023                              | (-0.059, 0.012)  | 0.73                | (0.42, 1.28)  |
|                 | Obese        | 45   | 0.017                               | (-0.004, 0.038)  | 3.19                | (0.84, 12.09) |
| 1958 NCDS       | Thinness     | 1668 | 0.004                               | (-0.020, 0.028)  | 1.04                | (0.86, 1.25)  |
|                 | Normal       | 8469 | -0.008                              | (-0.037, 0.021)  | Ref                 |               |
|                 | Overweight   | 880  | 0.003                               | (-0.015, 0.021)  | 1.05                | (0.81, 1.35)  |
|                 | Obese        | 176  | 0.001                               | (-0.007, 0.010)  | 1.10                | (0.64, 1.90)  |
| 1970 BCS        | Thinness     | 1000 | 0.002                               | (-0.017, 0.021)  | 1.06                | (0.84, 1.34)  |
|                 | Normal       | 9327 | -0.026                              | (-0.051, -0.001) | Ref                 |               |
|                 | Overweight   | 897  | 0.021                               | (0.003, 0.039)   | 1.35                | (1.05, 1.74)  |
|                 | Obese        | 25   | 0.003                               | (-0.000, 0.007)  | 4.07                | (0.93, 17.84) |
| 2001 MCS        | Thinness     | 612  | -0.018                              | (-0.039, 0.003)  | 0.90                | (0.63, 1.27)  |
|                 | Normal       | 5875 | -0.115                              | (-0.156, -0.073) | Ref                 |               |
|                 | Overweight   | 1812 | 0.073                               | (0.037, 0.110)   | 1.71                | (1.35, 2.17)  |
|                 | Obese        | 521  | 0.059                               | (0.041, 0.078)   | 3.73                | (2.51, 5.54)  |
| <u>15 years</u> |              |      |                                     |                  |                     |               |
| 1946 NSHD       | Thinness     | 280  | 0.027                               | (-0.012, 0.067)  | 1.53                | (0.93, 2.52)  |
|                 | Normal       | 2645 | -0.082                              | (-0.143, -0.022) | Ref                 |               |
|                 | Overweight   | 296  | 0.043                               | (-0.004, 0.090)  | 1.76                | (1.02, 3.05)  |
|                 | Obese        | 41   | 0.012                               | (-0.009, 0.033)  | 2.66                | (0.58, 12.29) |
| 1958 NCDS       | Thinness     | 920  | -0.005                              | (-0.028, 0.018)  | 0.99                | (0.77, 1.27)  |
|                 | Normal       | 7035 | -0.028                              | (-0.058, 0.003)  | Ref                 |               |
|                 | Overweight   | 736  | 0.021                               | (-0.000, 0.041)  | 1.33                | (1.01, 1.75)  |
|                 | Obese        | 133  | 0.012                               | (0.002, 0.022)   | 2.30                | (1.22, 4.31)  |
| 1970 BCS        | Thinness     | 857  | 0.006                               | (-0.023, 0.035)  | 1.14                | (0.88, 1.48)  |
|                 | Normal       | 5077 | -0.060                              | (-0.097, -0.024) | Ref                 |               |
|                 | Overweight   | 606  | 0.039                               | (0.014, 0.064)   | 1.66                | (1.22, 2.25)  |
|                 | Obese        | 109  | 0.015                               | (0.004, 0.027)   | 2.74                | (1.37, 5.45)  |
| 2001 MCS        | Thinness     | 467  | -0.022                              | (-0.041, -0.003) | 0.79                | (0.56, 1.11)  |
|                 | Normal       | 5067 | -0.093                              | (-0.135, -0.051) | Ref                 |               |
|                 | Overweight   | 1375 | 0.049                               | (0.012, 0.085)   | 1.51                | (1.16, 1.96)  |
|                 | Obese        | 484  | 0.067                               | (0.044, 0.089)   | 3.50                | (2.30, 5.32)  |

Supplementary Table 6. Body mass index (BMI), weight and height during childhood/adolescence: averages and socioeconomic differences

| Cohort    | Age | Year | n     | BMI, kg/m <sup>2</sup> |        |                                       | Weight, kg |        |                                       | Height, cm |        |                                       |
|-----------|-----|------|-------|------------------------|--------|---------------------------------------|------------|--------|---------------------------------------|------------|--------|---------------------------------------|
|           |     |      |       | Mean                   | Median | Social class difference, SII (95% CI) | Mean       | Median | Social class difference, SII (95% CI) | Mean       | Median | Social class difference, SII (95% CI) |
| 1946 NSHD | 7   | 1953 | 3783  | 15.8                   | 15.6   | 0.2 (0.0, 0.5)                        | 22.7       | 22.2   | -1.1 (-1.6, -0.6)                     | 119.8      | 119.4  | -3.8 (-4.7, -2.9)                     |
| 1958 NCDS | 7   | 1964 | 12565 | 15.7                   | 15.5   | 0.1 (-0.1, 0.2)                       | 22.7       | 22.2   | -1.0 (-1.3, -0.7)                     | 120.8      | 120.6  | -2.8 (-3.2, -2.3)                     |
| 2001 MCS  | 7   | 2008 | 11645 | 16.4                   | 16.0   | 0.6 (0.4, 0.7)                        | 24.5       | 23.7   | 0.3 (-0.2, 0.7)                       | 122.6      | 122.4  | -1.5 (-1.9, -1.0)                     |
| 1946 NSHD | 11  | 1957 | 3706  | 17.4                   | 17.0   | 0.3 (-0.1, 0.7)                       | 35.2       | 33.7   | -0.9 (-2.0, 0.2)                      | 141.6      | 140.6  | -3.2 (-4.4, -2.0)                     |
| 1958 NCDS | 11  | 1967 | 11630 | 17.3                   | 16.7   | 0.4 (0.2, 0.6)                        | 35.1       | 33.6   | -0.7 (-1.3, -0.1)                     | 142.3      | 142.2  | -3.1 (-3.7, -2.5)                     |
| 1970 BCS  | 10  | 1980 | 11214 | 17.4                   | 17.1   | 0.2 (0.0, 0.4)                        | 35.8       | 35.0   | -1.0 (-1.4, -0.6)                     | 142.2      | 142.0  | -3.0 (-3.5, -2.5)                     |
| 2001 MCS  | 11  | 2012 | 10983 | 18.9                   | 18.2   | 1.3 (1.0, 1.6)                        | 40.5       | 38.9   | 1.8 (0.9, 2.6)                        | 145.7      | 145.5  | -1.8 (-2.5, -1.2)                     |
| 1946 NSHD | 14  | 1961 | 3359  | 20.4                   | 20.0   | 0.5 (0.1, 1.0)                        | 53.6       | 52.5   | -0.6 (-2.2, 1.0)                      | 162.9      | 162.2  | -3.2 (-4.5, -1.8)                     |
| 1958 NCDS | 16  | 1974 | 10074 | 20.2                   | 19.7   | 0.6 (0.4, 0.9)                        | 53.7       | 52.5   | -0.7 (-1.5, 0.1)                      | 161.7      | 161.3  | -3.5 (-4.1, -2.9)                     |
| 1970 BCS  | 16  | 1986 | 7264  | 20.2                   | 19.7   | 0.7 (0.4, 1.0)                        | 53.5       | 52.3   | -0.4 (-1.3, 0.6)                      | 161.4      | 161.3  | -3.2 (-3.9, -2.5)                     |
| 2001 MCS  | 14  | 2015 | 9381  | 21.7                   | 20.9   | 1.4 (1.0, 1.8)                        | 60.9       | 59.2   | 2.3 (1.1, 3.6)                        | 168.9      | 168.5  | -2.1 (-2.8, -1.4)                     |

Notes: means and SII (slope index of inequality) are gender-adjusted. Maternal education defined using binary measures.



a) Body mass index

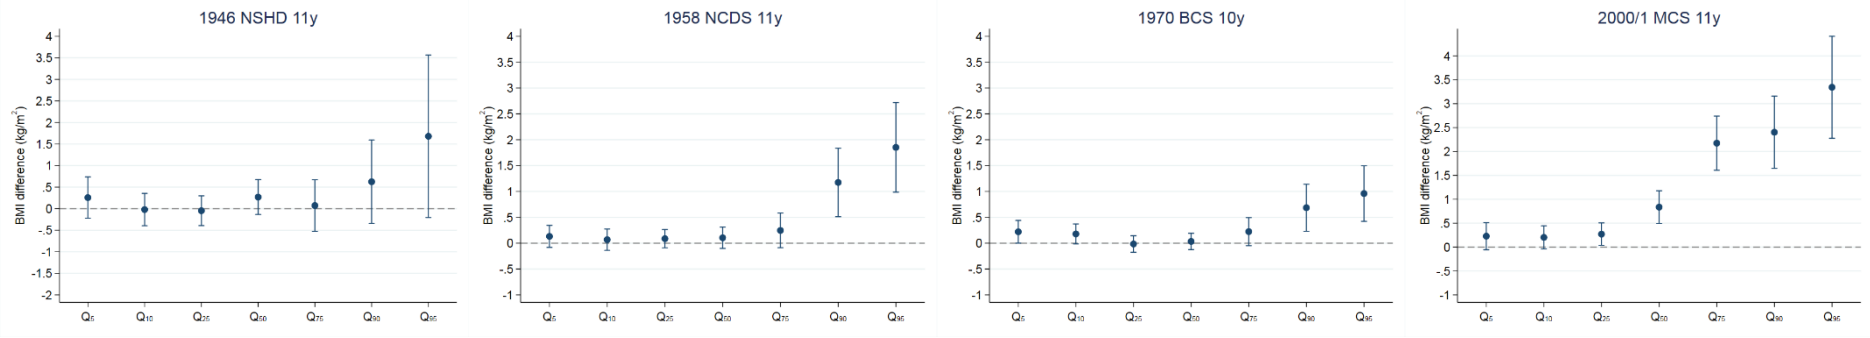

b) Weight

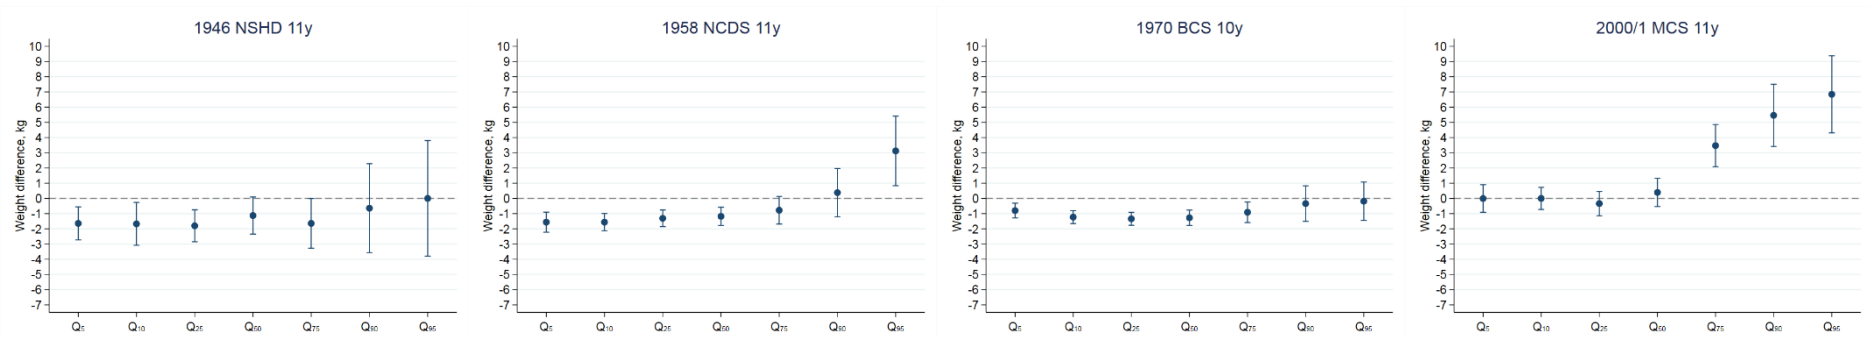

c) Height

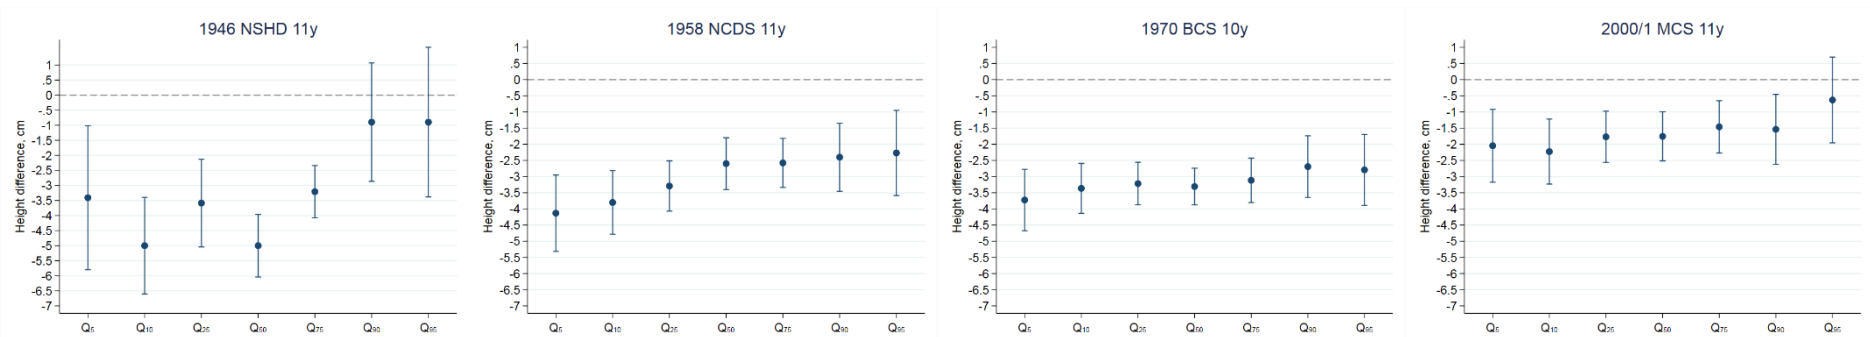

Supplementary Figure 1. Estimated differences in BMI, weight, and height (age 10/11 years) in the lowest versus highest maternal education (slope index of inequality): quantile regression estimates (95% CI).

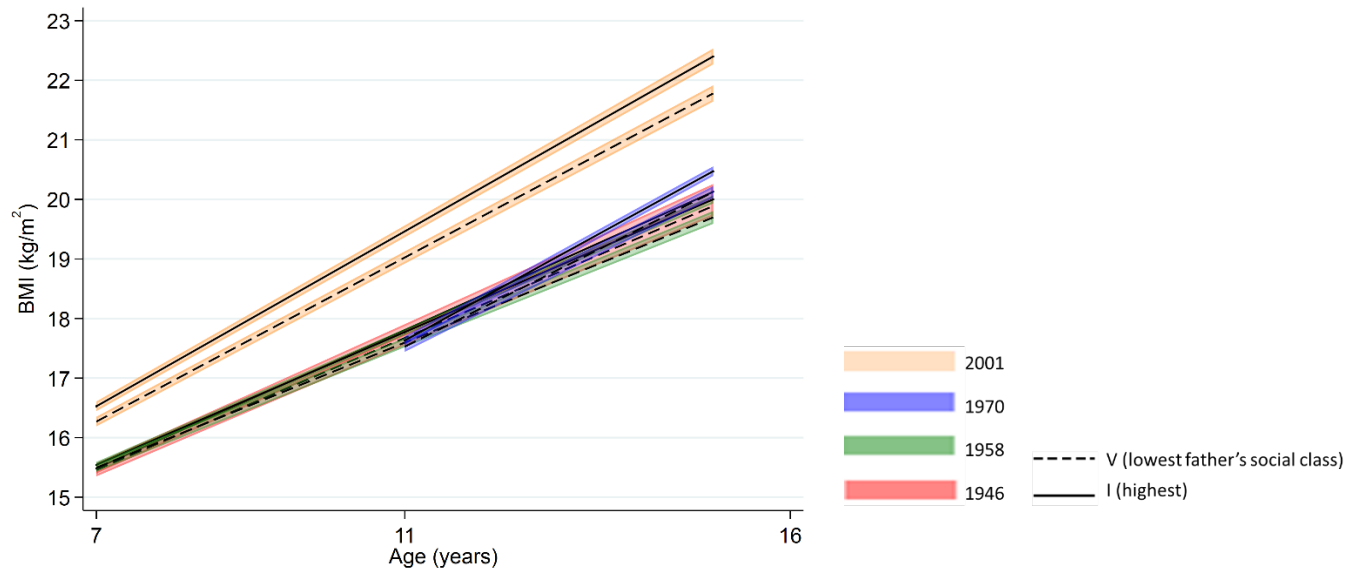

Supplementary Figure 2. Body mass index (BMI) across childhood and adolescence in relation to maternal education attainment in the 1946, 1958, 1970, and 2001 British birth cohort studies. Note: lines show estimated BMI along with 95% confidence intervals at each age among women, estimated using multilevel general linear regression models.

### a) Body mass index

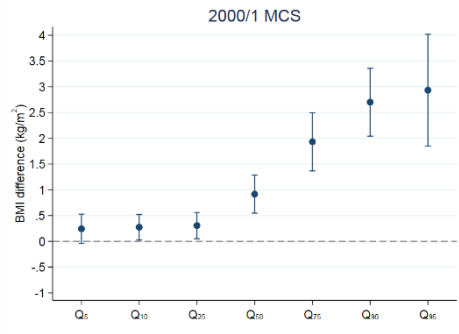

### b) Weight

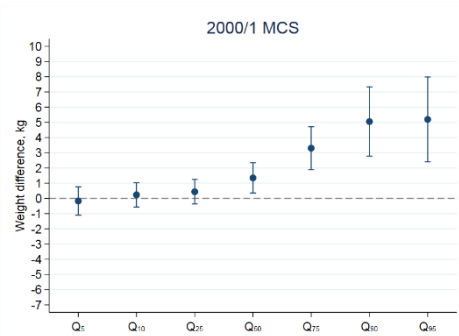

### c) Height

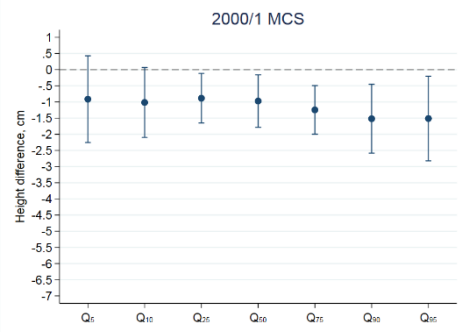

Supplementary Figure 3. Estimated differences in BMI, weight and height (age 11 years) in the lowest versus highest fathers social class (slope index of inequality): quantile regression estimates (95% CI) in the 2001 MCS (restricted to white participants)
